# Supplementary material for: A low iridium content greatly improves the peroxidase-like activity of noble metal nanozymes for sensitive colorimetric detection
Source: Royal Society of Chemistry journal article supplement (doi:10.1039/d4dt02065k), 2024-01-01
Supplement: d4dt02065k1.pdf [file d4dt02065k1.pdf]

## Supplementary Information

# A low iridium content greatly improves the peroxidase-like activity of noble metal nanozymes for sensitive colorimetric detection

*Jian Hao,<sup>‡</sup> <sup>a</sup> Rui Shang,<sup>‡</sup> <sup>a</sup> Miaotian Shi,<sup>\*a</sup> Jincheng Yuan,<sup>a</sup> Yi Tan,<sup>a</sup> Jiawei Liu<sup>\*b</sup> and*

*Kai Cai<sup>\*a</sup>*

<sup>a</sup> Life Science Instrumentation Center, College of Chemistry & Environmental  
Engineering, Yangtze University, Jingzhou 434100, China.

<sup>b</sup> Key Laboratory of Earth and Planetary Physics, Institute of Geology and  
Geophysics, Innovation Academy for Earth Sciences, Chinese Academy of Sciences,  
Beijing 100029, China.

\*Corresponding Author.

E-mail: [shimiaotian@yangtzeu.edu.cn](mailto:shimiaotian@yangtzeu.edu.cn) (M. S.); [caikai2000@163.com](mailto:caikai2000@163.com) (K. C.);

[liujiawei@mail.iggcas.ac.cn](mailto:liujiawei@mail.iggcas.ac.cn) (J. L.)

## Materials

Tellurium dioxide powder ( $\text{TeO}_2$ , 99.99%), and selenous acid ( $\text{H}_2\text{SeO}_3$ , 99.99%) were purchased from Aladdin Chemistry Co., Ltd. Hydrazine monohydrate ( $\text{N}_2\text{H}_4 \cdot \text{H}_2\text{O}$ , 85%, AR), sodium dodecyl sulfate (SDS, 99%), Chloroplatinic acid ( $\text{H}_2\text{PtCl}_6 \cdot 6\text{H}_2\text{O}$ , AR), Tetrachloroauric(III) acid tetrahydrate ( $\text{HAuCl}_4 \cdot 4\text{H}_2\text{O}$ , AR), Iridic chloride ( $\text{IrCl}_4$ , AR), polyvinylpyrrolidone (PVP10 Average molecular weight 58000 AR), hydrogenperoxide ( $\text{H}_2\text{O}_2$ , 30%, AR) were provided by Sinopharm Chemical Reagent Co., Ltd. 3,3',5,5'-tetramethylbenzidine (TMB), o-Phenylenediamine ( $\text{C}_6\text{H}_8\text{N}_2$ , OPD, 98%), Citric acid/sodium was obtained from McLean chemical reagent Co., Ltd.

## Material Characterization

Transmission electron microscopy (TEM) imaging was conducted on a FEI TECNAI F30 microscope operated at 200 kV and copper grids were used to load the samples. All values of the material sizes were measured through TEM images. X-ray spectroscopy (EDS) was carried out under the high-angle annular dark field (HAADF) mode with an EDAX attachment. Inductively coupled plasma-mass spectrometry (ICP-MS) measurements were performed on NexION 300Q (PerkinElmer, USA). X-ray diffraction (XRD) was tested on a Bruker D8 Advance X-ray diffractometer with  $\text{Cu K}\alpha$  radiation. Samples were prepared by depositing nanostructures on glass. The scanning speed was set as 15 degrees/min. X-ray photoelectron spectra (XPS) were collected on an ESCALAB 250Xi spectrophotometer (Thermo Fisher) with  $\text{Al K}\alpha$  X-ray radiation and calibrated using the C 1s peak (284.8 eV). UV-vis-NIR absorption spectra were measured by a Lambda 750UV-Vis-NIR spectrophotometer (PerkinElmer, USA).

## Measurement of the specific activity

Specific activity (SA) was measured according to the protocol reported in former reports.<sup>[1]</sup> Specifically, at 20 °C, 0.1 M citric acid/sodium citrate was selected as buffer (pH=4.0).  $\text{H}_2\text{O}_2$ , nanozyme material, TMB (50  $\mu\text{L}$  10 mg/mL) were added successively. The final volume is controlled at 1 mL, in which the concentration of  $\text{H}_2\text{O}_2$  is 1.0 M,

and the quality of nanozyme material added each time is controlled. The absorbance of the reaction solution at  $\lambda_{\max} = 653$  nm was measured by UV-vis spectrophotometer at the interval of 1 second immediately after the addition of all substances for 50 s. The absorbance-time curve is then obtained and SA is calculated by the following equation.

$$b_{\text{nanozyme}} = \frac{V}{\epsilon l} X \frac{\Delta A}{\Delta t}$$

where  $b_{\text{nanozyme}}$  is the nanozyme activity (U), V is the total volume of reaction solution ( $\mu\text{L}$ ),  $\epsilon$  is the molar absorption coefficient of the TMB substrate ( $39,000 \text{ M}^{-1} \text{ cm}^{-1}$  at 653 nm), l is the optical path length through reaction solution (cm), and  $\Delta A/\Delta t$  is the initial rate of the absorbance change ( $\text{min}^{-1}$ ). When using different amounts of the nanozyme to measure the peroxidase-like activity, the specific activity of the nanozyme was determined using the following equation:

$$SA = \frac{b_{\text{nanozyme}}}{m}$$

where SA is the specific activity of the nanozyme ( $\text{U mg}^{-1}$ ), and m is the nanozyme amount (mg).

### **Kinetic analysis**

Peroxidase-like activities of the nanozyme material were evaluated by the steady-state kinetic assays, according to the previous report.<sup>[2]</sup> Specifically, 0.1 M citric acid/sodium citrate were added successively as buffer (pH=4.0).  $\text{H}_2\text{O}_2$ , nanozyme material (50  $\mu\text{L}$ , 1 mg/L) and TMB were added in the cuvette (path length,  $l=1.0$  cm) at 20 °C. The final volume is controlled at 1 mL, in which the concentration of  $\text{H}_2\text{O}_2$  is 2.0 M, and TMB is controlled as the variable. After adding all substances, the absorbance of the reaction solution at  $\lambda_{\max} = 653$  nm was measured by UV-vis spectrophotometer at an interval of 2 seconds for 50 s. Then, the absorbance and time curve is obtained, from which the initial reaction rate is calculated and the maximum reaction rate  $V_{\max}$  and the Michaelis constant ( $K_m$ ) are accessed by the Michaelis-Menten equation.

$$V = \frac{V_{\max} [S]}{K_m + [S]}$$

where  $V_{\max}$  is the maximal reaction velocity,  $[S]$  is the concentration of TMB, and  $K_m$  is the Michaelis constant. The values of  $K_m$  and  $V_{\max}$  can be obtained from the double reciprocal plots.

### **Stability test process**

Citric acid/sodium citrate (0.1 M) was selected as buffer (pH=4.0) at 25 °C. TMB (50  $\mu$ L, 10 mg/mL), nanozyme material (50  $\mu$ L, 0.5 mg/L) and H<sub>2</sub>O<sub>2</sub> (30%) were added successively. The final volume is controlled at 1 mL. The absorbance of the reaction solution at  $\lambda_{\max}$ =653 nm was recorded by UV-vis spectrophotometer after the addition of all substances for 50 s. The same procedure was used every day for ten days.

### **Measurement of absorption spectrum of reaction system**

50  $\mu$ L TMB (10 mg/mL), 50  $\mu$ L nanozyme material (0.5 mg/L) and 100  $\mu$ L H<sub>2</sub>O<sub>2</sub> (30%) were added into a tube containing 800  $\mu$ L citric acid/sodium citrate buffer solution (0.1 M, pH=4.0) at 25 °C. The absorption spectra were recorded in the range of 300 ~ 800 nm after incubation for 1 min.

### **Measurement of absorbance of reaction system**

When measuring absorbance over time, 50  $\mu$ L TMB (10 mg/mL), 50  $\mu$ L nanozyme material (0.5 mg/L) and 100  $\mu$ L H<sub>2</sub>O<sub>2</sub> (30%) were added into a 2 mL tube containing 800  $\mu$ L citric acid/sodium citrate buffer solution (0.1 M, pH=4.0) at 25 °C. After incubation for 1 min, the absorbance of the solution at 653 nm was measured by UV-vis spectrophotometer at an interval of 2 seconds for 50 s. When measuring absorbance at different pH, the citric acid/sodium citrate buffer solution (0.1 M, pH=2.0, 3.0, 4.0, 5.0, 6.0 or 7.0) was used. When measuring absorbance at different temperature, the solution temperature was controlled at 10, 20, 30, 40, 50 or 60 °C.

### **Isopropanol quenching hydroxyl radical test process**

In simple terms, 50  $\mu$ L isopropanol, 50  $\mu$ L TMB (10 mg/mL), 50  $\mu$ L H<sub>2</sub>O<sub>2</sub> with different concentrations and 50  $\mu$ L nanozyme solution (1 mg/L) were added to sodium citrate (0.1 M, pH=4.0). The final volume is controlled at 1 mL, After adding all substances, the absorbance of the reaction solution at  $\lambda_{\max}$  = 653 nm was measured by

UV-vis spectrophotometer at an interval of 1 seconds for 50 s.

### **Colorimetric detection of OPD**

The detection of OPD was conducted as follows: 100  $\mu\text{L}$  PtAuIr nanozyme solution (10 mg/L) and 100 $\mu\text{L}$   $\text{H}_2\text{O}_2$  (30%) were added into a 2 mL tube containing 700  $\mu\text{L}$  citric acid/sodium citrate buffer solution (0.1 M, pH=4.0). Then, 100  $\mu\text{L}$  OPD solutions of different concentrations were added to the obtained mixture and incubated at room temperature for 5 min. The absorption spectra were recorded in the range of 300 ~ 600 nm. All measurements were performed in triplicate, and the standard deviation was plotted as error bars.

### **Theoretical calculations.**

The Vienna Ab Initio Package (VASP) was employed to perform all the density functional theory (DFT) calculations within the generalized gradient approximation (GGA) using the Perdew, Burke, and Enzerhof (PBE) formulation.<sup>[3-5]</sup> The projected augmented wave (PAW) potentials were applied to describe the ionic cores and take valence electrons into account using a plane wave basis set with a kinetic energy cutoff of 500 eV.<sup>[6,7]</sup> Partial occupancies of the Kohn–Sham orbitals were allowed using the Gaussian smearing method and a width of 0.05 eV. The electronic energy was considered self-consistent when the energy change was smaller than  $10^{-5}$  eV. A geometry optimization was considered convergent when the force change was smaller than 0.05 eV/Å. Grimme’s DFT-D3 methodology was used to describe the dispersion interactions.<sup>[8]</sup> The vacuum spacing perpendicular to the plane of the structure is 20 Å. The Brillouin zone integral utilized the surfaces structures of  $2\times 2\times 1$  monkhorst pack K-point sampling. Finally, the adsorption energies( $E_{\text{ads}}$ ) were calculated as  $E_{\text{ads}} = E_{\text{ad/sub}} - E_{\text{ad}} - E_{\text{sub}}$ , where  $E_{\text{ad/sub}}$ ,  $E_{\text{ad}}$ , and  $E_{\text{sub}}$  are the total energies of the optimized adsorbate/substrate system, the adsorbate in the structure, and the clean substrate, respectively. The free energy was calculated using the equation:

$$G = E_{\text{ads}} + \text{ZPE} - \text{TS}$$

where  $G$ ,  $E_{\text{ads}}$ , ZPE and TS are the free energy, total energy from DFT calculations, zero point energy and entropic contributions, respectively.

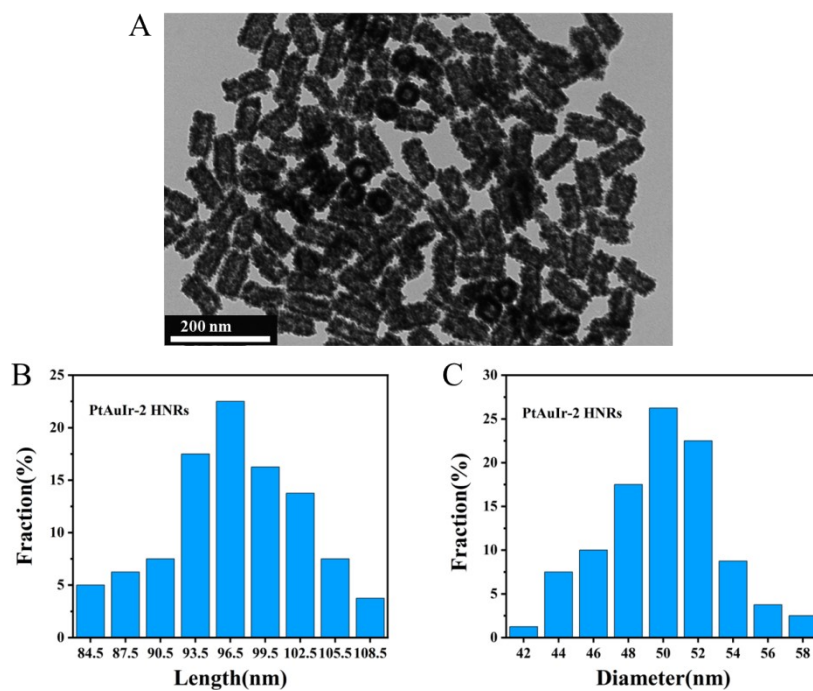

**Figure S1** (A) TEM of PtAuIr-2 HNRs. Statistical value of diameter (B) and length (C) of PtAuIr-2 HNRs.

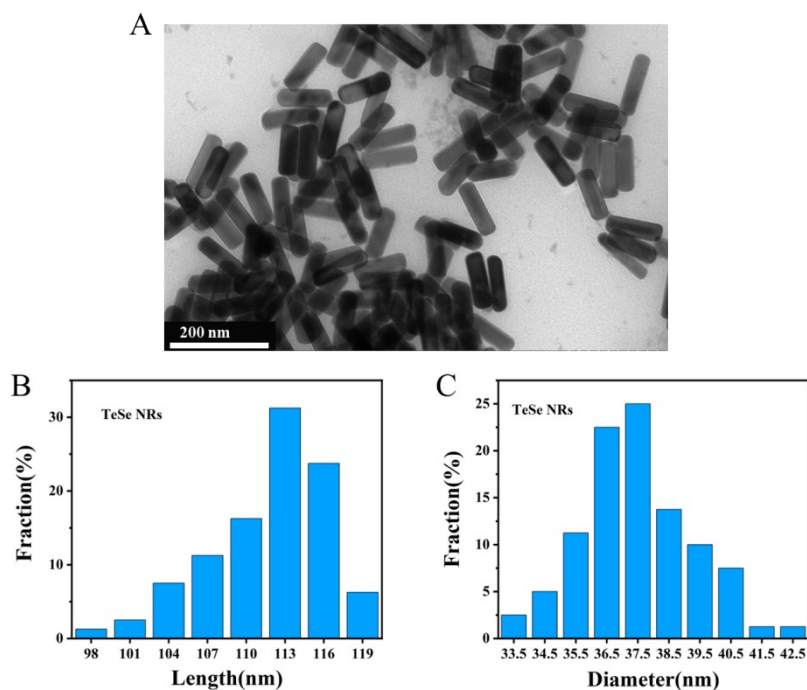

**Figure S2** (A) TEM of TeSe nanorod. Statistical value of diameter (B) and length (C) of TeSe nanorods.

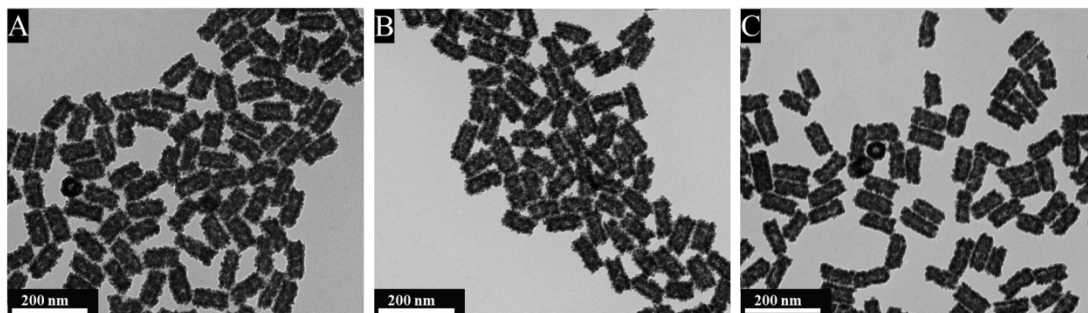

**Figure S3** TEM of PtAu HNRs, PtAuIr-1 HNRs and PtAuIr-3 HNRs.

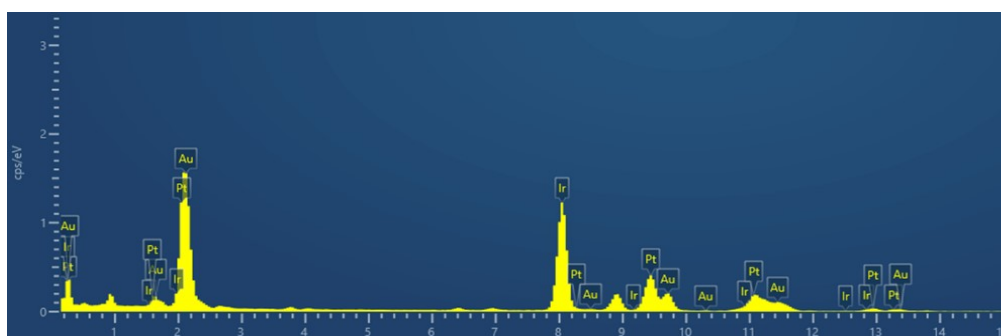

**Figure S4** EDS of PtAuIr-2 HNRs.

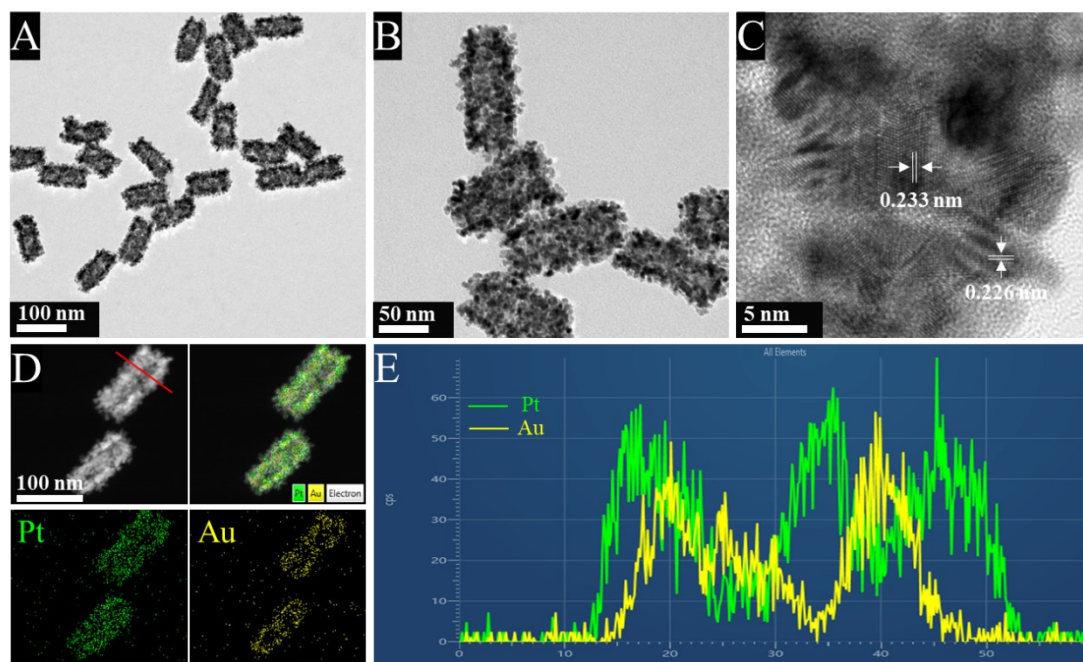

**Figure S5** (A,B) TEM images, (C) HRTEM image, (D) HAADF-STEM image and EDS mapping images of PtAu HNRs. (E) EDS line scanning of the PtAu HNRs.



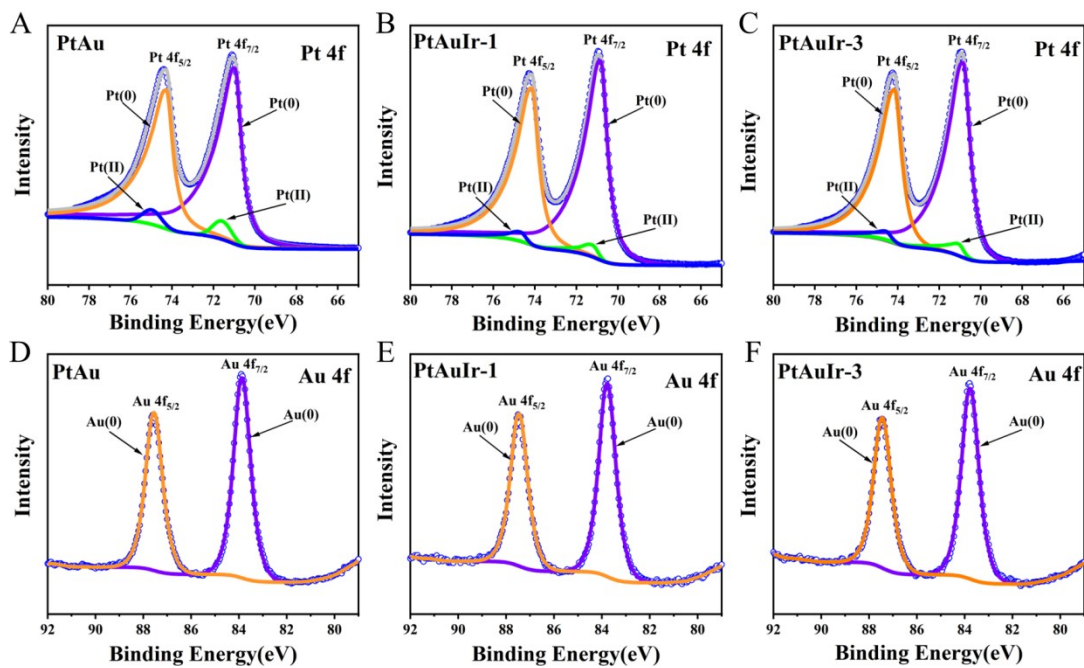

**Figure S6** XPS spectra of Pt 4f for PtAu (A), PtAuIr-1 (B), PtAuIr-3 (C); Au 4f for PtAu (D) PtAuIr-1 (E), PtAuIr-3 (F).

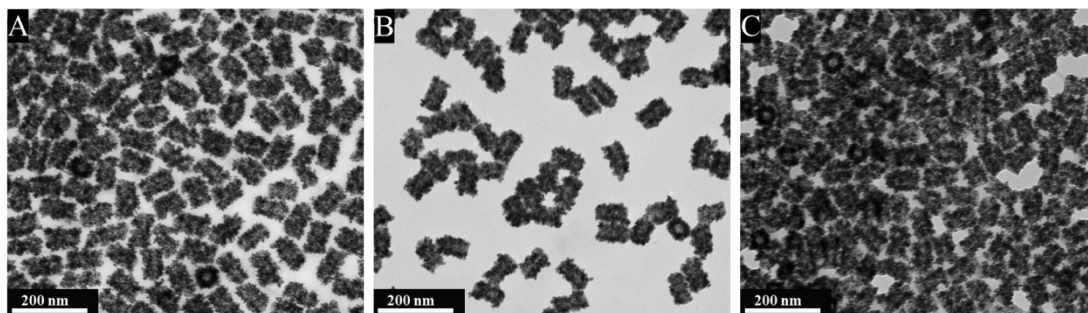

**Figure S7** TEM of Pt HNRs, PtIr-1 HNRs and PtIr-2 HNRs.

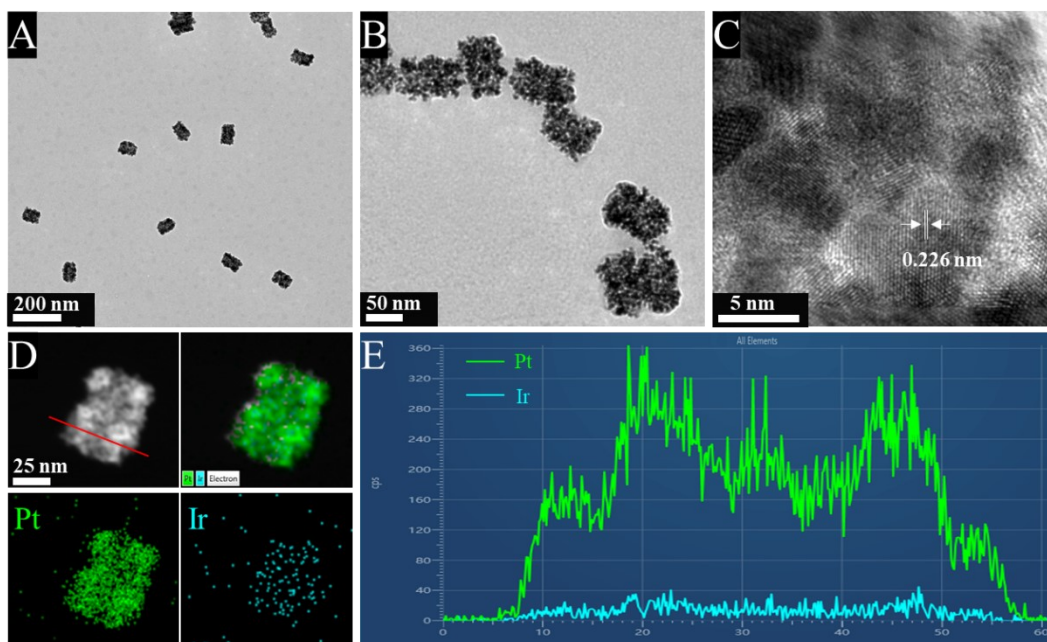

**Figure S8** (A, B) TEM images, (C) HRTEM image, (D) HAADF-STEM image and EDS mapping images of PtIr HNRs. (E) EDS line scanning of the PtIr HNRs.

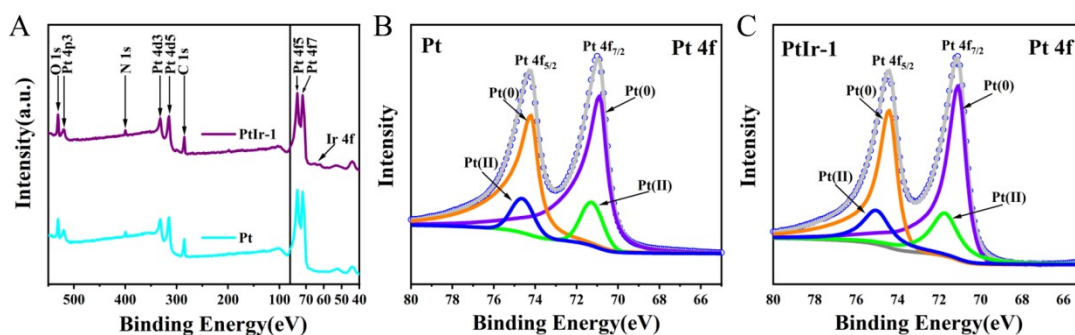

**Figure S9** (A) Wide XPS spectrum. XPS spectra of Pt 4f for Pt (B) PtIr-1(C).

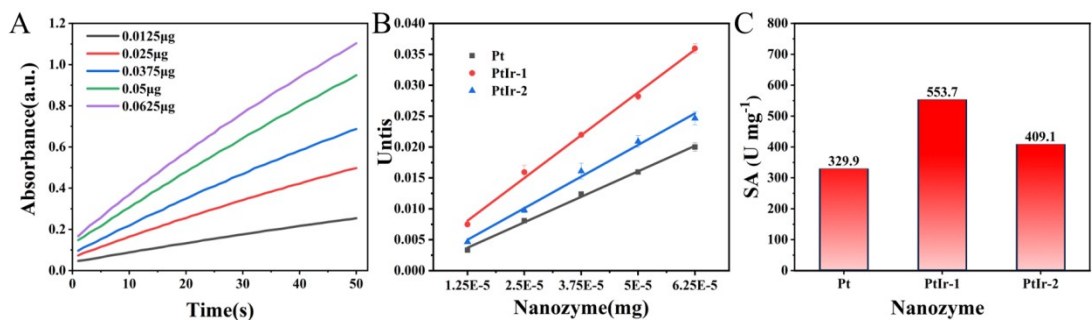

**Figure S10** (A) Time-absorbance curves under different mass of PtIr-1 nanozyme. (B) Measurement of SA values of Pt, PtIr-1, PtIr-2 nanozyme. (C) The SA of different nanozyme.

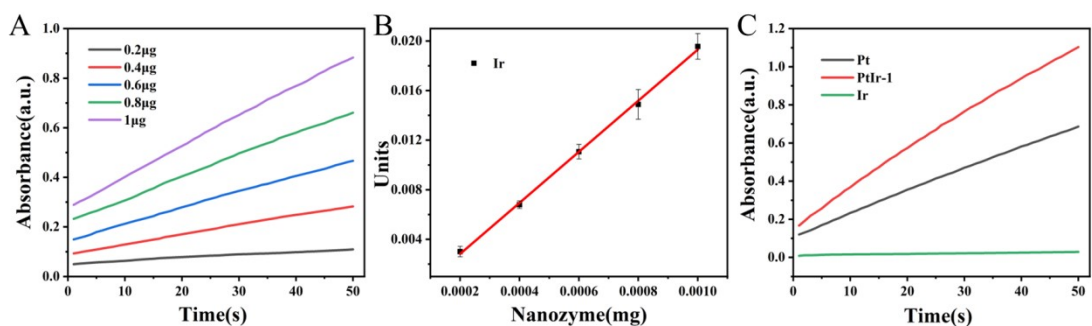

**Figure S11** (A) Time-absorbance curves under different mass of Ir nanozymes. (B) Measurement of SA values of Ir nanozyme. (C) Time-absorbance curves of different nanozymes with the same mass (0.0625 μg).

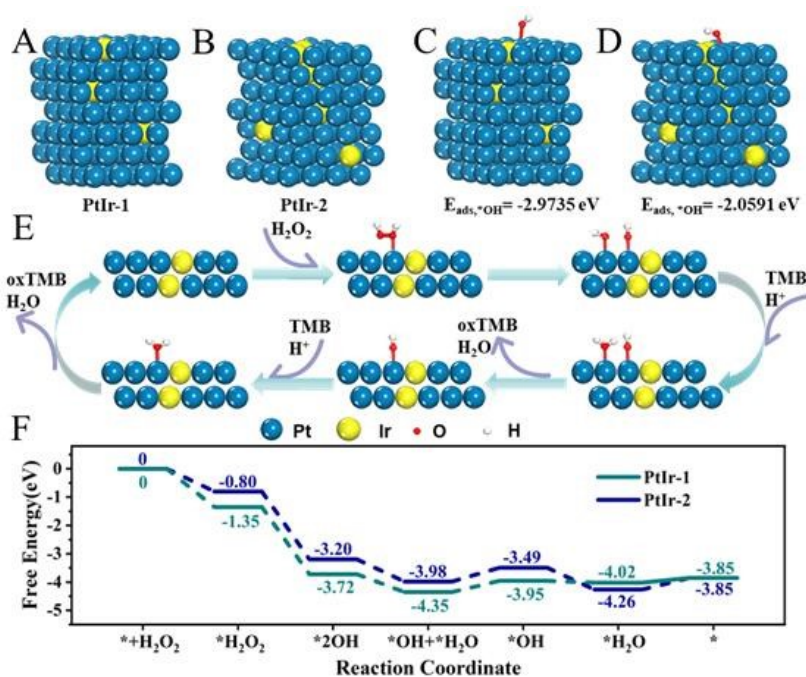

**Figure S12** (A) Structure of the PtIr-1 nanozyme. (B) Structure of the PtIr-2 nanozyme. (C) The adsorption energy of hydroxyl radicals on PtIr-1(111). (D) The adsorption energy of hydroxyl radicals on PtIr-2(111). (E) Reaction diagram of the catalytic process. (F) Energy change diagram of the reaction on two PtIr HNRs.

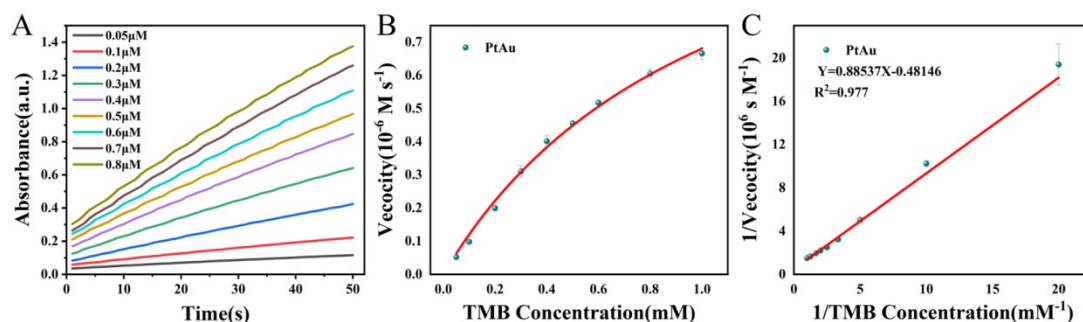

**Figure S13** (A) Time-absorbance curves at different TMB concentrations of PtAu nanozyme. (B) Initial reaction velocity against TMB concentration of PtAu nanozyme. (C) Double-reciprocal plots for PtAu nanozyme.

**Table S1** The elements ratio of all HNRs.

| Samples  | Pt ( $\mu\text{g/L}$ ) | Au ( $\mu\text{g/L}$ ) | Ir ( $\mu\text{g/L}$ ) |
|----------|------------------------|------------------------|------------------------|
| PtAu     | 170.8028               | 70.2986                | /                      |
| PtAuIr-1 | 142.3450               | 53.7938                | 2.3484                 |
| PtAuIr-2 | 139.1440               | 63.2967                | 6.9864                 |
| PtAuIr-3 | 113.7989               | 50.5932                | 8.0784                 |
| PtAuIr-4 | 129.5195               | 52.1276                | 13.9100                |
| Pt       | 148.4923               | /                      | /                      |
| PtIr-1   | 173.4708               | /                      | 4.9584                 |
| PtIr-2   | 155.8484               | /                      | 10.4296                |

**Table S2** The specific activities of nanozymes.

|                      | Substrate | SA( $\text{U mg}^{-1}$ ) | Ref. |
|----------------------|-----------|--------------------------|------|
| HG-Heme              | TMB       | 67.3                     | 9    |
| FeNCP/NW             | TMB       | 86.9                     | 10   |
| PdPtAu alloy         | TMB       | 81.245                   | 11   |
| A-Ru                 | TMB       | 164.46                   | 12   |
| Os NPS               | TMB       | 393                      | 13   |
| USPBNPS              | TMB       | 465.8                    | 14   |
| FeN <sub>3</sub> P   | TMB       | 316                      | 15   |
| Natural HRP          | TMB       | 327                      | 16   |
| H-Pt <sub>3</sub> Sn | TMB       | 345.32                   | 17   |
| FeSA-PtC             | TMB       | 87.7                     | 18   |
| PtPdAu HNRs          | TMB       | 563.71                   | 1    |
| PtAuIr-2             | TMB       | 863.2                    |      |
| PtAuIr-3             | TMB       | 666.9                    |      |
| PtAuIr-1             | TMB       | 638.6                    |      |
| PtAuIr-4             | TMB       | 546.6                    | This |
| PtAu                 | TMB       | 508.2                    | work |
| PtIr-1               | TMB       | 553.7                    |      |
| PtIr-2               | TMB       | 409.1                    |      |
| Pt                   | TMB       | 329.9                    |      |

**Table S3** Comparison of limit of detection of OPD using different nanozymes.

| Method      | Materials                                   | Linear Range ( $\mu\text{M}$ ) | LOD ( $\mu\text{M}$ ) | Ref.      |
|-------------|---------------------------------------------|--------------------------------|-----------------------|-----------|
| Colorimetry | $\text{Fe}_3\text{O}_4/\text{N-GQDs}$       | 1-90                           | 0.23                  | 19        |
| Colorimetry | Tar-IrNPs                                   | 4.6-46                         | 0.17                  | 20        |
| Colorimetry | N,Cu-CDs                                    | 5-200                          | 1.12                  | 21        |
| Colorimetry | AgNPs                                       | 1-80                           | 0.161                 | 22        |
| Colorimetry | SW-<br>$\text{Fe}_2\text{O}_3/\text{MnO}_2$ | 16.7-500                       | 5                     | 23        |
| Colorimetry | PtAuIr NRs                                  | 0.5-100                        | 0.076                 | This work |

## References

- 1 Y. Tan, J. Yuan, R. Shang, J. Hao, S. Hu and K. Cai, *Dalton Trans.*, 2024, **53**, 5624-5631.
- 2 Z. Xi, K. Wei, Q. Wang, M. J. Kim, S. Sun, V. Fung and X. Xia, *J. Am. Chem. Soc.*, 2021, **143**, 2660-2664.
- 3 G. Kresse and J. Furthmüller, *Phys. Rev. B*, 1996, **54**, 11169-11186.
- 4 J. P. Perdew, K. Burke and M. Ernzerhof, *Phys. Rev. Lett.*, 1996, **77**, 3865-3868.
- 5 G. Kresse and D. Joubert, *Phys. Rev. B*, 1999, **59**, 1758-1775.
- 6 P. E. Blöchl, *Phys. Rev. B*, 1994, **50**, 17953-17979.
- 7 S. Grimme, J. Antony, S. Ehrlich and H. Krieg, *J. Chem. Phys.*, 2010, **132**, 154104.
- 8 G. Henkelman, B. P. Uberuaga and H. Jónsson, *J. Chem. Phys.*, 2000, **113**, 9901-9904.
- 9 W. Xu, W Song, Y Kang, L. Jiao, Y. Wu, Y. Chen, X. Cai, L. Zheng, W. Gu and C. Zhu, *Anal. Chem.*, 2021, **93**, 12758-12766.
- 10 S. Ding, J. A. Barr, Z. Lyu, F. Zhang, M. Wang, P. Tieu, X. Li, M. H. Engelhard, Z. Feng, S. P. Beckman, X. Pan, J. Li, D. Du and Y. Lin, *Adv. Mater.*, 2023, 2209633.
- 11 L. Huang, Y. Zhou, Y. Zhu, H. Su, S. Yang, L. Feng, L. Zhao, S. Liu and K. Qian, *Biosens. Bioelectron.*, 2022, **210**, 114254.
- 12 Y. Tang, Y. Wu, W. Xu, L. Jiao, Y. Chen, M. Sha, H. Ye, W. Gu and C. Zhu, *Anal. Chem.*, 2021, **94**, 1022-1028.
- 13 S. He, L. Yang, P. Balasubramanian, S. Li, H. Peng, Y. Kuang, H. Deng and W. Chen, *J. Mater. Chem. A*, 2020, **8**, 25226-25234.
- 14 Z. Qin, B. Chen, Y. Mao, C. Shi, Y. Li, X. Huang, F. Yang and N. Gu, *ACS Appl. Mater. Interfaces*, 2020, **12**, 57382-57390.
- 15 S. Ji, B. Jiang, H. Hao, Y. Chen, J. Dong, Y. Mao, Z. Zhang, R. Gao, W. Chen, R. Zhang, Q. Liang, H. Li, S. Liu, Y. Wang, Q. Zhang, L. Gu, D. Duan, M. Liang, D. Wang, X. Yan and Y. Li, *Nat. Catal.*, 2021, **4**, 407-417.
- 16 X. Niu, Q. Shi, W. Zhu, D. Liu, H. Tian, S. Fu, N. Cheng, S. Li, J. N. Smith, D. Du and Y. Lin, *Biosens. Bioelectron.*, 2019, **142**, 111495.
- 17 Y. Tang, Y. Chen, Y. Wu, W. Xu, Z. Luo, H. Ye, W. Gu, W. Song, S. Guo, and C. Zhu, *Nano Lett.*, 2022, **23**, 267-275.
- 18 Y. Chen, L. Jiao, H. Yan, W. Xu, Y. Wu, L. Zheng, W. Gu and C. Zhu, *Anal. Chem.*, 2021, **93**, 12353-12359.
- 19 B. Shi, Y. Su, L. Zhang, M. Huang, X. Li and S. Zhao, *Nanoscale*, 2016, **8**, 10814-10822.
- 20 S. Hao, C. Fu, L. Zhou, Z. Guo and Q. Song, *J. Mater. Chem. B*, 2023, **11**, 2770-2777.
- 21 L. Lin, Y. Xiao, Y. Wang, Y. Zeng, Z. Lin and X. Chen, *Microchim. Acta*, 2019, **186**, 1-8.
- 22 N. Li, Y. Gu, M. Gao, Z. Wang, D. Xiao, Y. Li, R. Lin and H. He, *Spectrochim. Acta, Part A*, 2015, **140**, 328-333.
- 23 R. María-Hormigos, B. Jurado-Sánchez and A. Escarpa, *Anal. Chem.*, 2018, **90**, 9830-9837.
